# Supplementary material for: Thermal Deformation of Granite under Different Temperature and Pressure Pathways
Source: Hindawi journal article supplement (doi:10.1155/2019/7869804), 2019-01-08
Supplement: f1 [file 7869804.f1.xlsx]

## Sheet: Figure. 2
	Temperature	Axial strain	Axial strain
Units	℃	10-3	10-3
Comments		Pc=5.0MPa	Pc=0 MPa
	100	0	0
	150	-0.0001	0
	200	-0.0019	0
	250	-0.0039	0
	300	-0.0061	-0.0012
	350	-0.0063	-0.0024
	400	-0.0067	-0.0042
	450	-0.0071	-0.0079
	500	-0.0081	-0.0086
	550	-0.0088	-0.01
	600	-0.0089	-0.013

## Sheet: Figure. 3
	Heating cycles	Axial strain
Units		10-3
Comments		Absolute value of axial strain at 300℃
	1	0.0018
	2	0.0061
	3	0.0026
	4	0.0012
	5	0.000883

## Sheet: Figure. 4
	Heating cycles	Axial displacement
Units		mm
Comments		Original displacement before each heating
	1	0.598
	2	1.173
	3	4.212
	4	4.282
	5	4.901

## Sheet: Figure. 5
	Temperature	α	Temperature	α
Units	℃	10-5	℃	10-5
Comments	confining pressure:5.0MPa		confining pressure:0MPa
	25	0	25	0
	50	0	50	0
	100	0	70	0
	125	0	90	0
	135	3e-06	110	0
	145	9e-06	130	0
	150	2.16e-05	150	0
	175	3.48e-05	170	0
	200	3.94e-05	190	0
	225	4.08e-05	210	0
	250	4.34e-05	230	0
	275	4.5e-05	250	0
	302	2.35e-05	260	0
	310	1.25e-06	270	2.63e-06
	325	0	290	1.65e-05
	350	0	310	4.31e-05
	362	6.92e-06	330	5.48e-05
	375	1.27e-05	350	4.26e-05
	408	6.35e-06	370	3.58e-05
	425	2.04e-07	390	6.05e-05
	438	1.13e-05	410	5.13e-05
	450	2.15e-05	430	2.18e-05
	475	1.9e-05	450	2.52e-05
	500	1.7e-05	470	5.15e-05
	525	1.38e-05	490	6.13e-05
	550	1.2e-05	510	3.31e-05
	555	9e-06	530	2.34e-05
	560	5e-06	550	2.92e-05
	565	2e-06	570	4.55e-05
	575	0	590	5.07e-05
	600	2e-07	600	4.31e-05

## Sheet: Figure. 6
	Temperature	α	α
Units	℃	10-5	10-5
Comments		heating rate:5.5℃/min	heating rate:3℃/min
	30	0	0
	50	0	0
	70	0	0
	90	0	0
	110	0	0
	130	0	0
	150	0	0
	170	0	0
	190	0	0
	210	0	0
	230	0	0
	250	1.5671e-06	0
	260	1.04474e-05	0
	270	2.8469e-05	2.62884e-06
	290	2.74243e-05	1.64916e-05
	310	1.985e-05	4.30974e-05
	330	2.69019e-05	5.475e-05
	350	4.80578e-05	4.26028e-05
	370	3.8394e-05	3.57522e-05
	390	2.82079e-05	6.04633e-05
	410	8.48848e-05	5.12624e-05
	430	7.70492e-05	2.18194e-05
	450	2.69019e-05	2.52369e-05
	470	1.20145e-05	5.15253e-05
	490	1.22756e-05	6.1252e-05
	510	2.82079e-05	3.31234e-05
	530	3.36927e-05	2.33967e-05
	550	1.74993e-05	2.91801e-05
	570	5.48486e-05	4.54789e-05
	590	8.46236e-05	5.07366e-05
	600	5.95499e-05	4.3113e-05
